# Supplementary material for: One pot synthesis of unusual meso-dipyrrinyl corrole
Source: Royal Society of Chemistry journal article supplement (doi:10.1039/c7ra02664a), 2017-01-01
Supplement: c7ra02664a1.pdf [file c7ra02664a1.pdf]

## One Pot Synthesis of Unusual Meso-Dipyrrinyl Corrole

Laxman Vamshi Krishna Kandala, Tejinder Kaur, Mangalampalli Ravikanth\*

Department of Chemistry, Indian Institute of Technology Bombay, Powai,

Mumbai 400076, India. Email: ravikanth@chem.iitb.ac.in

### Supporting Information

| Entry | Contents                                 | Figure | Page no. |
|-------|------------------------------------------|--------|----------|
| 1.    | HRMS of compound <b>1</b>                | S1     | 2        |
| 2.    | <sup>13</sup> C NMR of compound <b>1</b> | S2     | 3        |

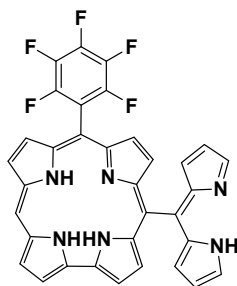

Molecular formula:  $C_{34}H_{19}F_5N_6$   $[M+H]^+$  formula:  $C_{34}H_{20}F_5N_6$

Calculated mass for  $[M+H]^+$ :  $m/z = 607.1664$

Experimental mass for  $[M+H]^+$ :  $m/z = 607.1651$

### DEPARTMENT OF CHEMISTRY, I.I.T.(B)

| Analysis Info |                                   | Acquisition Date |                           |
|---------------|-----------------------------------|------------------|---------------------------|
| Analysis Name | D:\Data\DEC-16\MR-KL-MFCORDPM 3.d | 12/30/2016       | 11:09:16 AM               |
| Method        | Tune_pos_NAICSI-1000.m            | Operator         | cpr in                    |
| Sample Name   | MR-KL-MFCORDPM 3                  | Instrument       | maXis impact 282001.00081 |
| Comment       | C34H19F5N6                        |                  |                           |

| Acquisition Parameter |          |                       |           |
|-----------------------|----------|-----------------------|-----------|
| Source Type           | ESI      | Ion Polarity          | Positive  |
| Focus                 | Active   | Set Capillary         | 4500 V    |
| Scan Begin            | 50 m/z   | Set End Plate Offset  | -500 V    |
| Scan End              | 1000 m/z | Set Collision Cell RF | 600.0 Vpp |
|                       |          | Set Nebulizer         | 0.3 Bar   |
|                       |          | Set Dry Heater        | 180 °C    |
|                       |          | Set Dry Gas           | 4.0 l/min |
|                       |          | Set Divert Valve      | Source    |

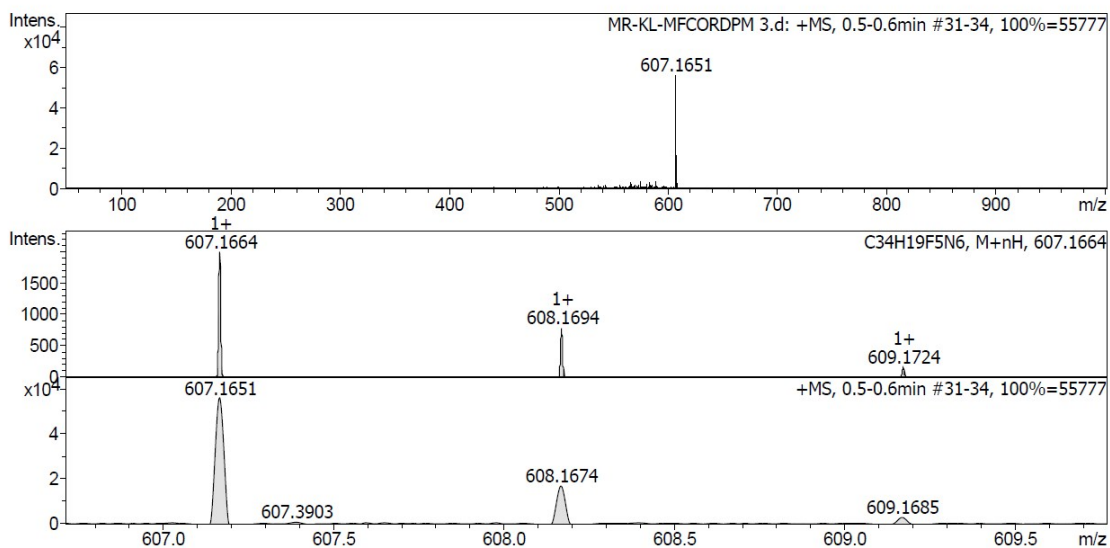

| Meas. m/z | # | Ion Formula                                                   | m/z      | err [ppm] | mSigma | # Sigma | Score  | rdb  | e <sup>-</sup> Conf | N-Rule |
|-----------|---|---------------------------------------------------------------|----------|-----------|--------|---------|--------|------|---------------------|--------|
| 607.1651  | 1 | C <sub>34</sub> H <sub>20</sub> F <sub>5</sub> N <sub>6</sub> | 607.1664 | -2.1      | 48.5   | 1       | 100.00 | 25.5 | even                | ok     |

Figure S1: HRMS of compound 1 with simulated mass pattern.

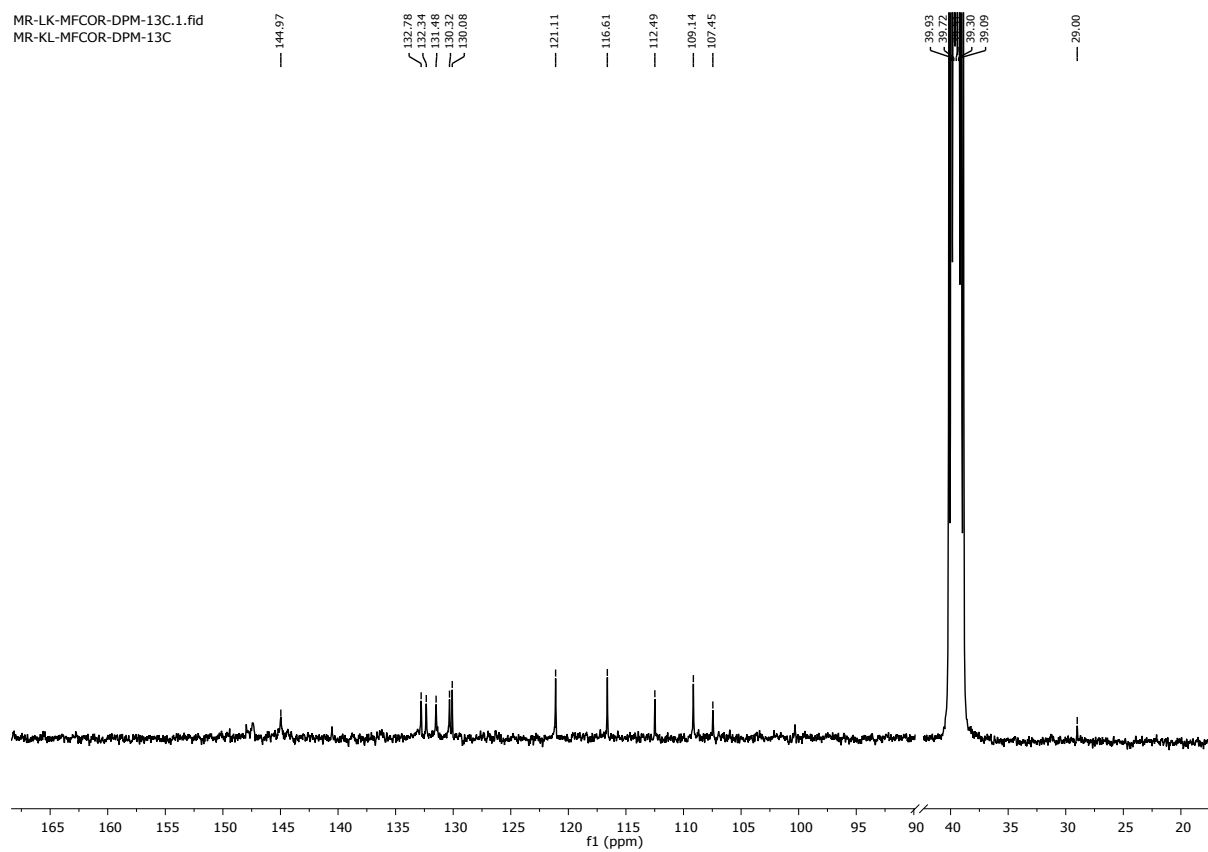

Figure S2:  $^{13}\text{C}$  NMR of compound **1**
